# Supplementary material
Source: PubMed Central journal article supplement (PMC2041968)
Supplement: pcbi.0030189.sd002.pdf [file pcbi.0030189.sd002.pdf]

# Universally Sloppy Parameter Sensitivities in Systems Biology Models

## Supporting Text 1: Stiffest Eigenvectors

Ryan N. Gutenkunst, Joshua J. Waterfall, Fergal P. Casey,  
Kevin S. Brown, Christopher R. Myers, and James P. Sethna

The following figures show the four stiffest eigenvectors of  $H^{\chi^2}$  (corresponding to the four largest eigenvalues) for each model in our collection. In each eigenvector the five parameters with the largest contributions are labeled. With few exceptions, the eigenvectors tend to be inscrutable combinations of many parameters.

- 
- [1] Tyson JJ (1991) Modeling the cell division cycle: cdc2 and cyclin interactions. *Proc Natl Acad Sci USA* 88:7328–7332.
  - [2] Zwolak JW, Tyson JJ, Watson LT (2005) Globally optimised parameters for a model of mitotic control in frog egg extracts. *Syst Biol (Stevenage)* 152:81–92.
  - [3] Goldbeter A (1991) A minimal cascade model for the mitotic oscillator involving cyclin and cdc2 kinase. *Proc Natl Acad Sci USA* 88:9107–9111.
  - [4] Vilar JMG, Kueh HY, Barkai N, Leibler S (2002) Mechanisms of noise-resistance in genetic oscillators. *Proc Natl Acad Sci USA* 99:5988–5992.
  - [5] Edelstein SJ, Schaad O, Henry E, Bertrand D, Changeux JP (1996) A kinetic mechanism for nicotinic acetylcholine receptors based on multiple allosteric transitions. *Biol Cybern* 75:361–379.
  - [6] Kholodenko BN (2000) Negative feedback and ultrasensitivity can bring about oscillations in the mitogen-activated protein kinase cascades. *Eur J Biochem* 267:1583–1588.
  - [7] Lee E, Salic A, Krüger R, Heinrich R, Kirschner MW (2003) The roles of APC and Axin derived from experimental and theoretical analysis of the Wnt pathway. *PLoS Biol* 1:e10.
  - [8] Leloup JC, Goldbeter A (1999) Chaos and birhythmicity in a model for circadian oscillations of the PER and TIM proteins in drosophila. *J Theor Biol* 198:445–459.
  - [9] Brown KS, Hill CC, Calero GA, Myers CR, Lee KH, et al. (2004) The statistical mechanics of complex signaling networks: nerve growth factor signaling. *Phys Biol* 1:184–195.
  - [10] von Dassow G, Meir E, Munro EM, Odell GM (2000) The segment polarity network is a robust developmental module. *Nature* 406:188–192.
  - [11] Ueda HR, Hagiwara M, Kitano H (2001) Robust oscillations within the interlocked feedback model of Drosophila circadian rhythm. *J Theor Biol* 210:401–406.
  - [12] Locke JCW, Southern MM, Kozma-Bognr L, Hibberd V, Brown PE, et al. (2005) Extension of a genetic network model by iterative experimentation and mathematical analysis. *Mol Syst Biol* 1:0013.
  - [13] Zak DE, Gonye GE, Schwaber JS, Doyle FJ III (2003) Importance of input perturbations and stochastic gene expression in the reverse engineering of genetic regulatory networks: insights from an identifiability analysis of an in silico network. *Genome Res* 13:2396–2405.
  - [14] Curto R, Voit EO, Sorribas A, Cascante M (1998) Mathematical models of purine metabolism in man. *Math Biosci* 151:1–49.
  - [15] Chassagnole C, Noisommit-Rizzi N, Schmid JW, Mauch K, Reuss M (2002) Dynamic modeling of the central carbon metabolism of *Escherichia coli*. *Biotechnol Bioeng* 79:53–73.
  - [16] Chen KC, Calzone L, Csikasz-Nagy A, Cross FR, Novak B, et al. (2004) Integrative analysis of cell cycle control in budding yeast. *Mol Biol Cell* 15:3841–3862.
  - [17] Sasagawa S, Ozaki Y, Fujita K, Kuroda S (2005) Prediction and validation of the distinct dynamics of transient and sustained ERK activation. *Nat Cell Biol* 7:365–373.

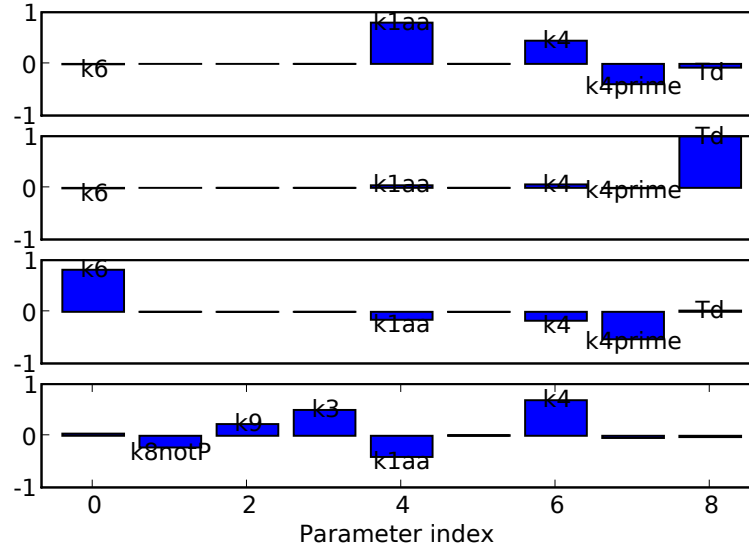

FIG. 1: Model (a): Tyson's model of the eukaryotic cell cycle [1].

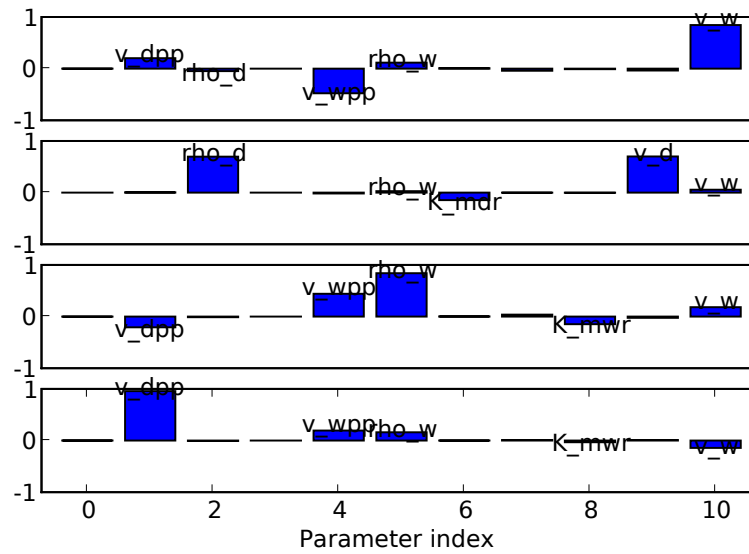

FIG. 2: Model (b): Zwolak *et al.*'s model of the Xenopus egg cell cycle [2].

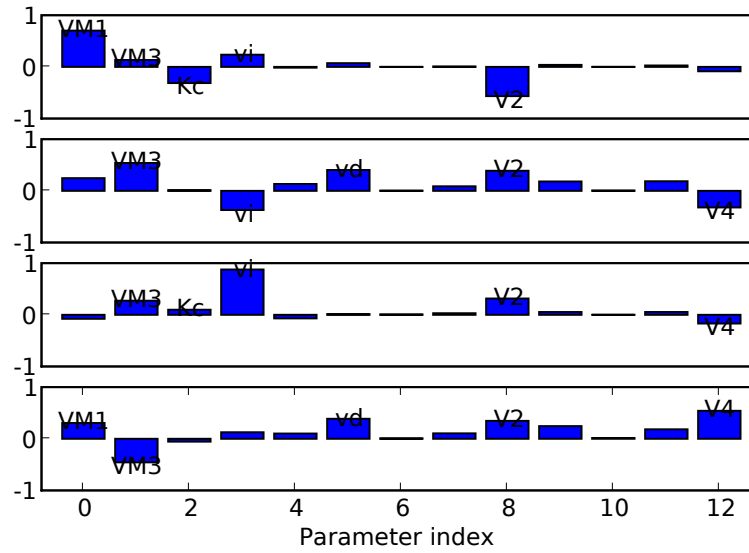

FIG. 3: Model (c): Goldbeter's model of eukaryotic mitosis [3].

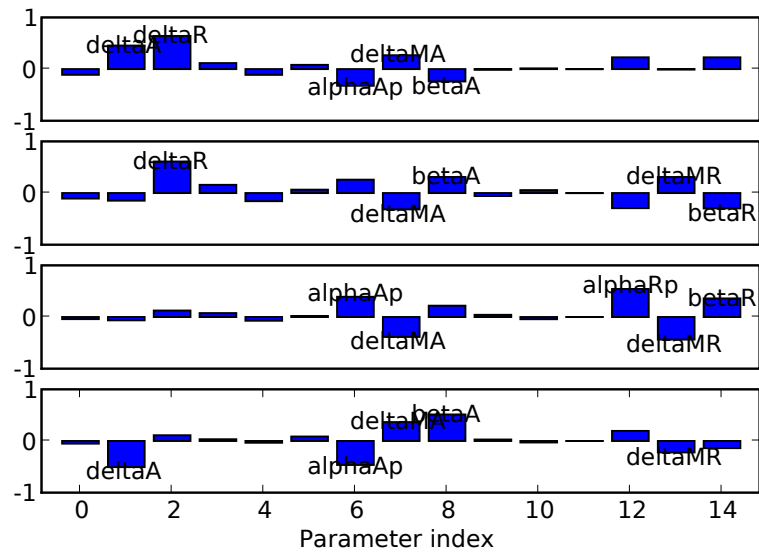

FIG. 4: Model (d): Vilar *et al.*'s generic circadian rhythm model [4].

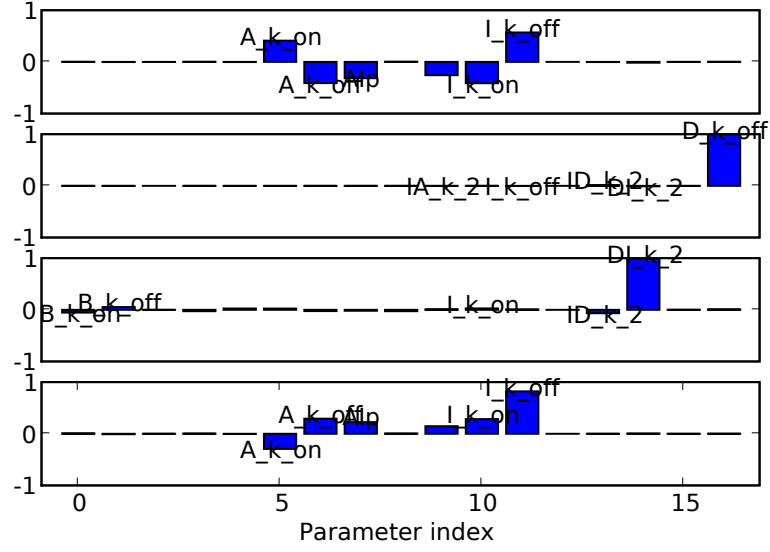

FIG. 5: Model (e): Edelstein *et al.*'s model of nicotinic acetylcholine intra-receptor dynamics [5].

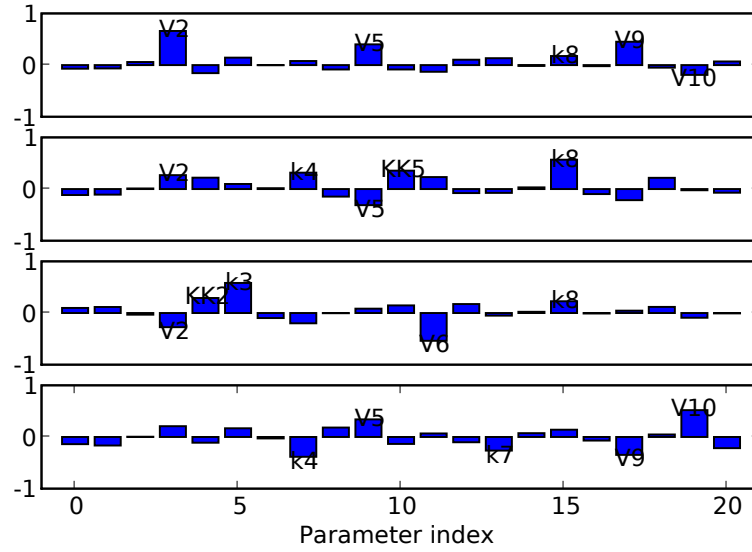

FIG. 6: Model (f): Kholodenko's model of a generic kinase cascade [6].

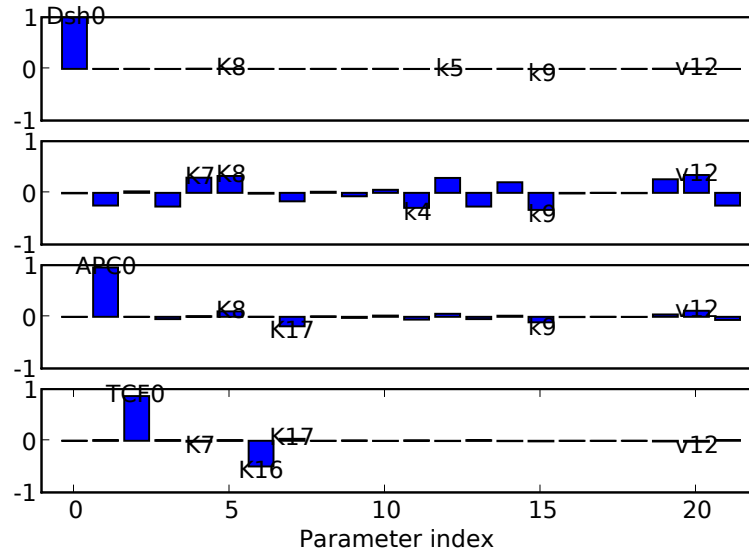

FIG. 7: Model (g): Lee *et al.*'s model of Xenopus Wnt signaling [7].

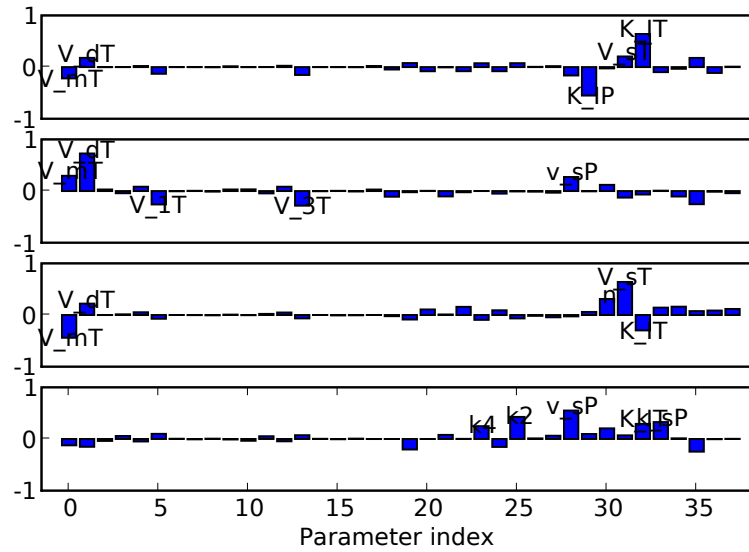

FIG. 8: Model (h): Leloup and Goldbeters's model of Drosophila circadian rhythm [8].

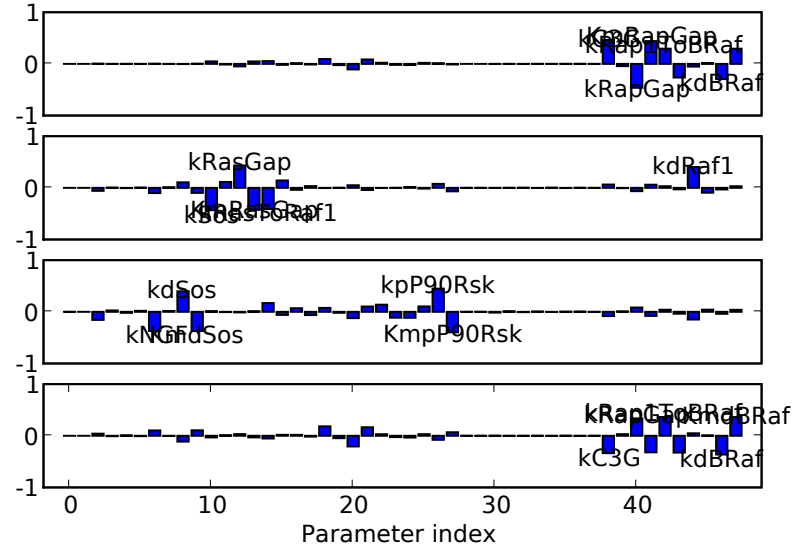

FIG. 9: Model (i): Brown *et al.*'s model of rat growth-factor signaling [9].

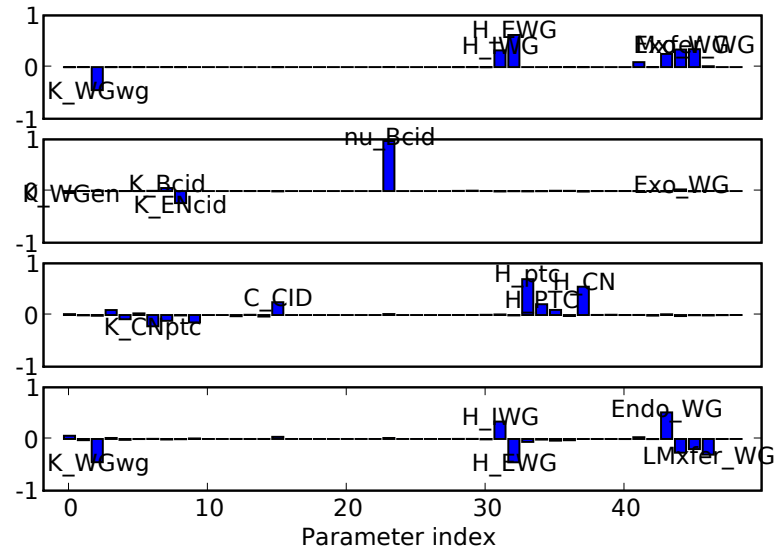

FIG. 10: Model (j): von Dassow *et al.*'s model of the *Drosophila* segment polarity network [10].

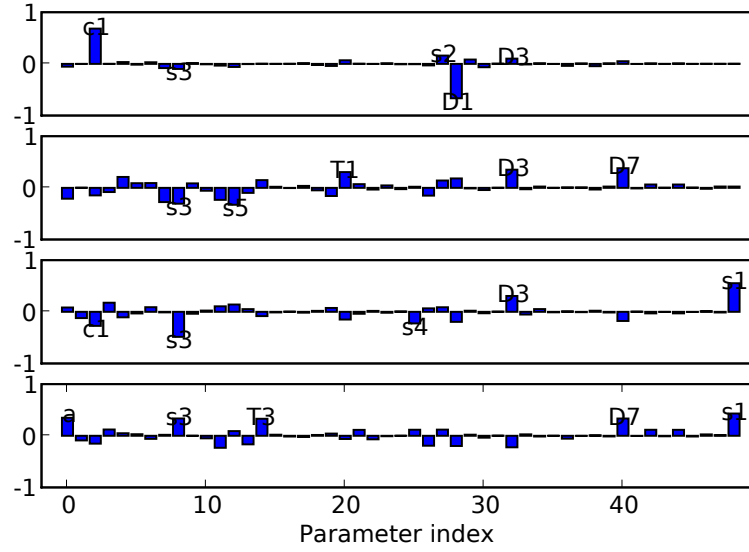

FIG. 11: Model (k): Ueda *et al.*'s model of *Drosophila* circadian rhythm [11].

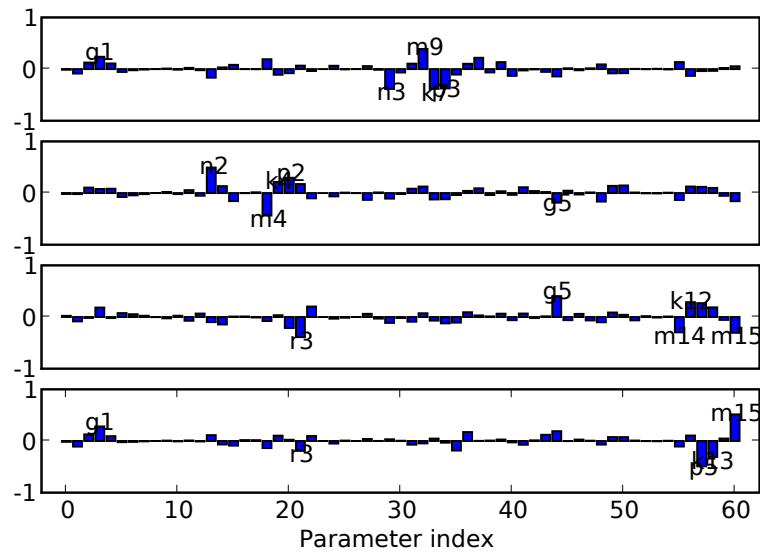

FIG. 12: Model (l): Locke *et al.*'s model of *Arabidopsis* circadian rhythm [12].





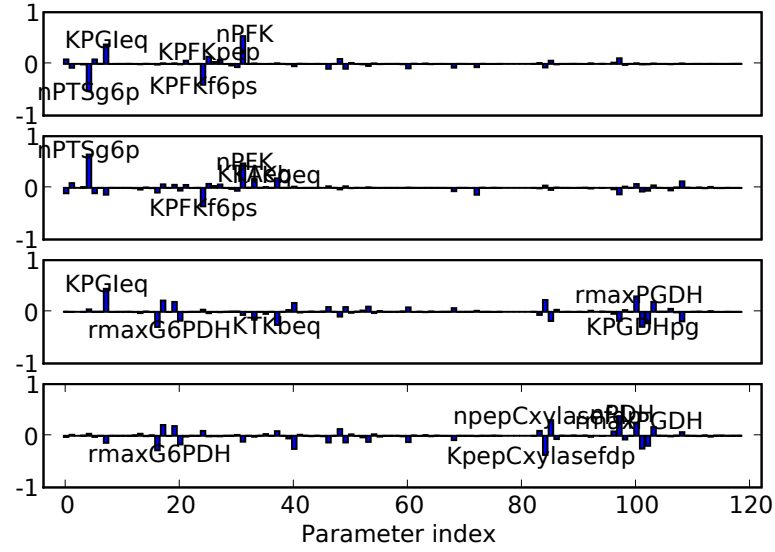

FIG. 15: Model (o): Chassagnole *et al.*'s model of *E. coli* carbon metabolism [15].

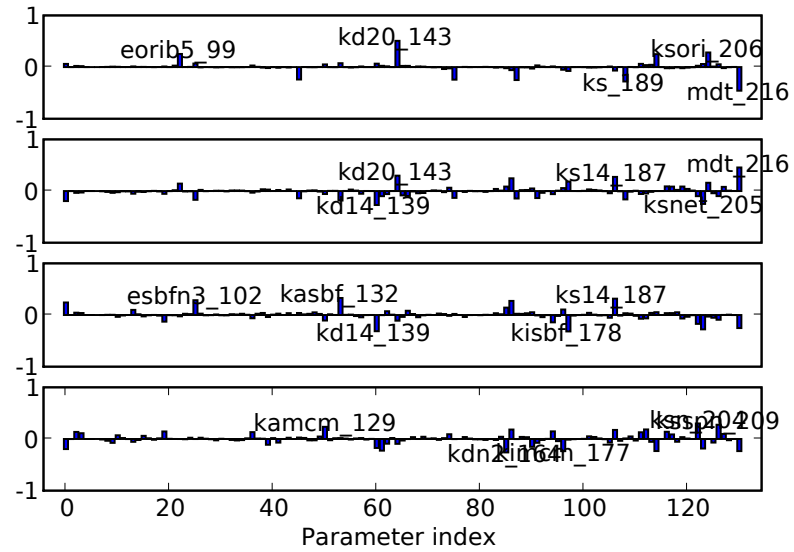

FIG. 16: Model (p): Chen *et al.*'s model of the budding yeast cell cycle [16].

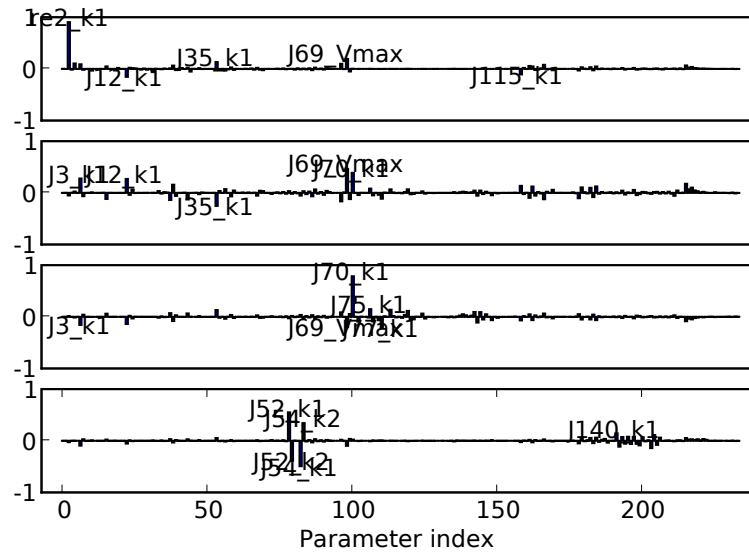

FIG. 17: Model (q): Sasagawa *et al.*'s model of rat growth-factor signaling [17].
